# Supplementary material
Source: PubMed Central journal article supplement (PMC7261630)
Supplement: NIHMS1582550-supplement-1.pdf [file NIHMS1582550-supplement-1.pdf]

## Supporting Information

*for*

### Comparative Immunological Studies of Tumor-Associated Lewis X, Lewis Y, and KH-1 Antigens

Jiatong Guo,<sup>†</sup> Wenjie Jiang,<sup>†</sup> Qingjiang Li, Mohit Jaiswal, and Zhongwu Guo\*

*Department of Chemistry, University of Florida, 214 Leigh Hall, Gainesville, Florida 32611, United States*

<sup>†</sup>Equal contribution to this work.

\*Corresponding author email: [zguo@chem.ufl.edu](mailto:zguo@chem.ufl.edu)

#### Table of contents

|                                                        |     |
|--------------------------------------------------------|-----|
| 1. ELISA data .....                                    | 2-4 |
| 2. FACS data .....                                     | 6   |
| 3. Antibody-mediated CDC data.....                     | 6   |
| 4. Mass spectra of glycoconjugates 2a, 2b and 2c ..... | 7-9 |

## 1. ELISA data

**Table S1.** Total antibody titers of pooled day 0, 21, and 43 sera derived from mice immunized with conjugates **1a**, **1b** and **1c**, respectively

|     | Total antibody titer |                   |                 |
|-----|----------------------|-------------------|-----------------|
|     | <b>1a</b>            | <b>1b</b>         | <b>1c</b>       |
| d0  | 33.01±16.02          | 114.12±25.78      | 29.48±25.21     |
| d21 | 3005.45±352.22*      | 2819.41±662.82*   | 676.09±348.20*  |
| d43 | 8815.03±320.52*      | 17591.98±1133.63* | 4690.68±420.70* |

\*Significantly different ( $p < 0.05$ ) from the antibody titer of mouse serum obtained before the initial immunization.

**Table S2.** The IgG antibody titers of pooled day 0, 21 and 43 sera from mice immunized with conjugates **1a**, **1b** and **1c**, respectively

|     | IgG antibody titer |                   |                   |
|-----|--------------------|-------------------|-------------------|
|     | <b>1a</b>          | <b>1b</b>         | <b>1c</b>         |
| d0  | 2.70±2.66          | 0.23±0.20         | 0.42±0.41         |
| d21 | 9.20±7.89          | 3912.44±539.92*   | 3.30±1.64         |
| d43 | 3400.64±586.23*    | 33827.38±1634.39* | 12252.78±1167.76* |

\*Significantly different ( $p < 0.05$ ) from the antibody titer of mouse serum obtained before the initial immunization.

**Table S3.** The IgM antibody titers of pooled day 0, 21 and 43 sera from mice immunized with conjugates **1a**, **1b** and **1c**, respectively

|     | IgM antibody titer |                |                  |
|-----|--------------------|----------------|------------------|
|     | <b>1a</b>          | <b>1b</b>      | <b>1c</b>        |
| d0  | 36.47±36.46        | 1.43±0.02      | 61.49±59.90      |
| d21 | 5762.77±1407.26*   | 209.92±83.01   | 790.76±369.07    |
| d43 | 10851.59±950.93*   | 650.93±227.87* | 3186.76±1177.96* |

\*Significantly different ( $p < 0.05$ ) from the antibody titer of mouse serum obtained before the initial immunization.

**Table S4.** Results of the cross-reactivity of pooled day 43 antisera from mice immunized with conjugates **1a**, **1b** and **1c**.

| Coating antigen | Total antibody titer |                  |                 | IgG antibody titer |                  |                  |
|-----------------|----------------------|------------------|-----------------|--------------------|------------------|------------------|
|                 | <b>1a</b>            | <b>1b</b>        | <b>1c</b>       | <b>1a</b>          | <b>1b</b>        | <b>1c</b>        |
| <b>2a</b>       | 8815.03±320.52       | 20710.31±2054.89 | 5257.24±2393.74 | 8003.22±646.66     | 39084.32±719.88  | 21332.28±943.68  |
| <b>2b</b>       | 5219.07±1902.36      | 17591.98±1133.60 | 5473.40±1436.61 | 6221.09±573.94     | 32458.46±1079.17 | 21001.82±2358.34 |
| <b>2c</b>       | 5906.11±2387.21      | 22601.55±2236.12 | 4690.68±420.70  | 3598.32±823.69     | 38851.45±970.79  | 20385.16±1779.32 |

\*Significantly different ( $p < 0.05$ ) between the two indicated groups.

**Table S5.** ELISA results of the cross-reactivity of each pooled day 43 antiserum with mannose-HSA containing the same linker.

| Coating antigen    | Total antibody titer |                  |                 |
|--------------------|----------------------|------------------|-----------------|
|                    | <b>1a</b>            | <b>1b</b>        | <b>1c</b>       |
| <b>2a</b>          | 8815.03±320.52       |                  |                 |
| <b>2b</b>          |                      | 17591.98±1133.60 |                 |
| <b>2c</b>          |                      |                  | 4690.68±420.70  |
| <b>Mannose-HSA</b> | 3215.33±594.55*      | 4393.55±875.52*  | 2602.28±642.89* |

\*Significantly different ( $p < 0.05$ ) from the antibody titers obtained with antigen-HSA conjugates **2a**, **2b**, and **2c**, respectively.

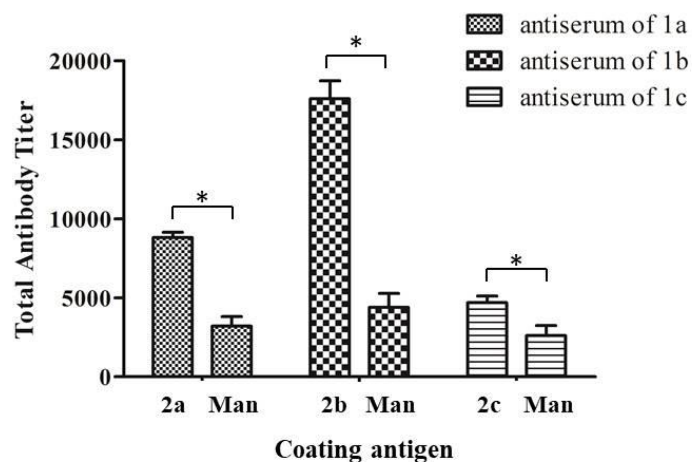

**Figure S1.** ELISA results of the cross-reactivity of each pooled day 43 antiserum with mannose-HSA conjugate containing the same linker (original data are shown in Table S5). The mannose-HSA conjugate (22 glycans/conjugate) was used as coating antigen and anti-kappa-AP was used as secondary antibody to detect total antibodies. \* Statistically different ( $p < 0.05$ ) between the two groups.

**Table S6.** ELISA results of the cross-reactivity of each pooled day 43 antiserum with lactose-HSA conjugate.

| Coating antigen    | Total antibody titer |                  |                 |
|--------------------|----------------------|------------------|-----------------|
|                    | <b>1a</b>            | <b>1b</b>        | <b>1c</b>       |
| <b>2a</b>          | 8815.03±320.52       |                  |                 |
| <b>2b</b>          |                      | 17591.98±1133.60 |                 |
| <b>2c</b>          |                      |                  | 4690.68±420.70  |
| <b>Lactose-HSA</b> | 365.27±48.46*        | 3070.10±125.5*   | 1263.73±383.43* |

\*Significantly different ( $p < 0.05$ ) from the antibody titers obtained with antigen-HSA conjugates **2a**, **2b**, and **2c**, respectively.

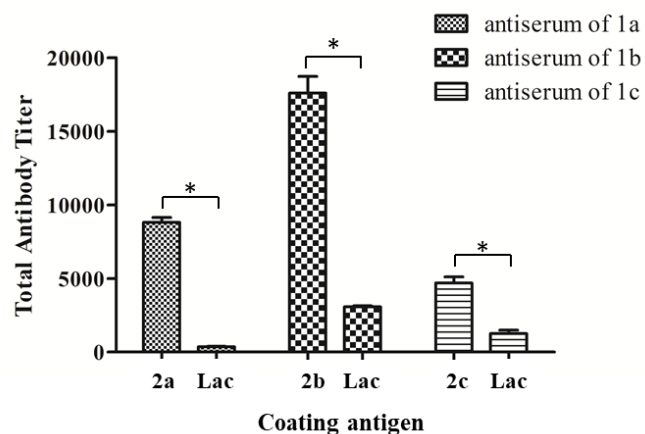

**Figure S2.** ELISA results of the cross-reactivity of each pooled day 43 antiserum with lactose-HSA conjugate containing the same linker (original data are shown in Table S6). The lactose-HSA conjugate (10 glycans/conjugate) was used as coating antigen and anti-kappa-AP was used as secondary antibody to detect total antibodies. \* Statistically different ( $p < 0.05$ ) between the two groups.

## 2. FACS data

**Table S6.** Median fluorescence intensity (MFI) results of FACS

| Cell line | MFI          |                 |                 |                |
|-----------|--------------|-----------------|-----------------|----------------|
|           | NS           | <b>1a</b>       | <b>1b</b>       | <b>1c</b>      |
| MCF-7     | 153.67±53.20 | 2039.67±382.79* | 1851.67±346.87* | 959.67±198.48* |
| SKMEL     | 148.67±60.70 | 361.67±125.56   | 350.00±115.72   | 307.33±126.33  |

\*Significantly different ( $p < 0.05$ ) from the MFI of NS.

## 3. Antibody-mediated CDC data

**Table S7.** Results of antibody-mediated CDC expressed as cell lysis percentage.

| Cell line | Cell lysis percentage (%) |             |             |             |
|-----------|---------------------------|-------------|-------------|-------------|
|           | NS                        | <b>1a</b>   | <b>1b</b>   | <b>1c</b>   |
| MCF-7     | 5.32±1.57                 | 38.17±8.12* | 30.17±3.97* | 20.58±2.33* |
| SKMEL     | 2.39±0.92                 | 3.25±1.27   | 2.07±0.52   | 5.03±2.09   |

\* Significantly different ( $p < 0.05$ ) from the cell lysis percentage caused by NS.

#### 4. Mass spectra of glycoconjugates 2a, 2b, and 2c

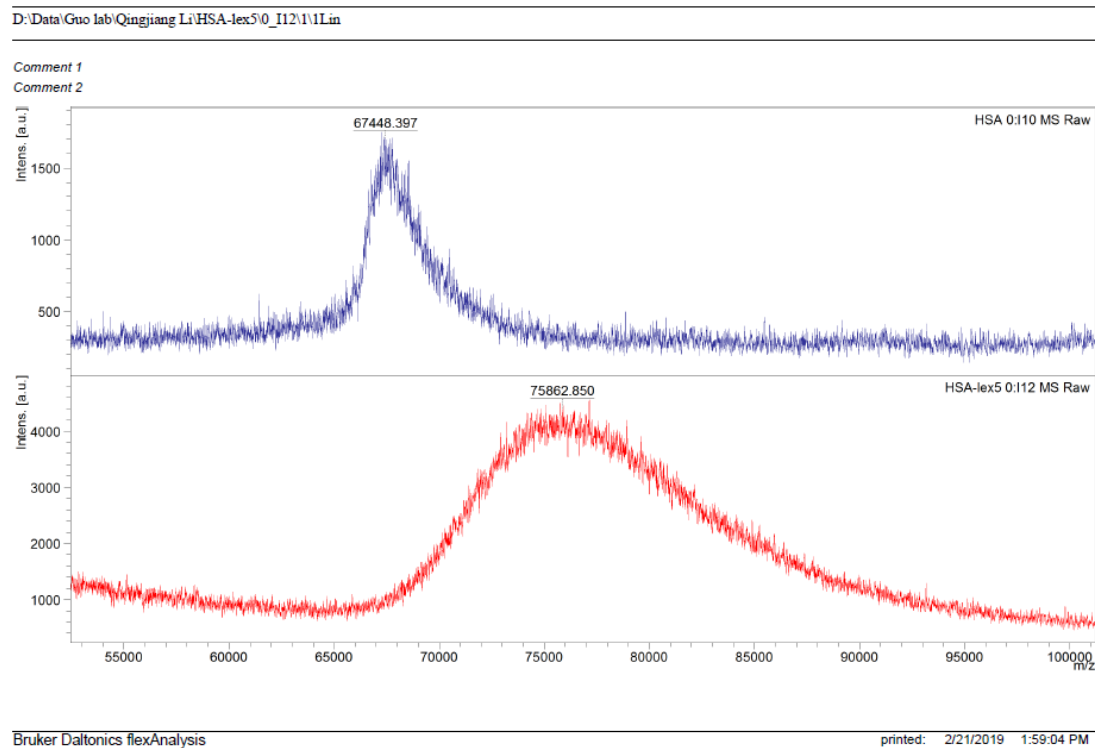

**Figure S2.** MALDI-TOF mass spectra of HSA (top) and conjugate **2a** (bottom) that were used for the calculation of carbohydrate loading of **2a**.

D:\Data\Guo lab\Qingjiang Li\HSA-ley6\0\_I15\2\1Lin

Comment 1

Comment 2

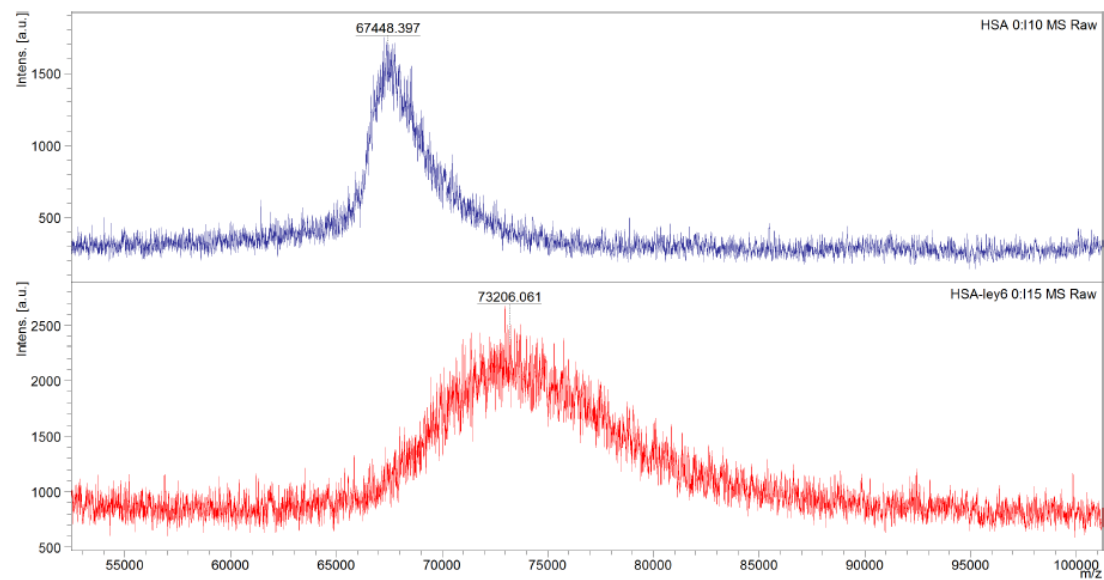

Bruker Daltonics flexAnalysis

printed: 2/21/2019 2:00:31 PM

**Figure S3.** MALDI-TOF mass spectra of HSA (top) and conjugate **2b** (bottom) that were used for the calculation of carbohydrate loading of **2b**.



Comment 1

Comment 2

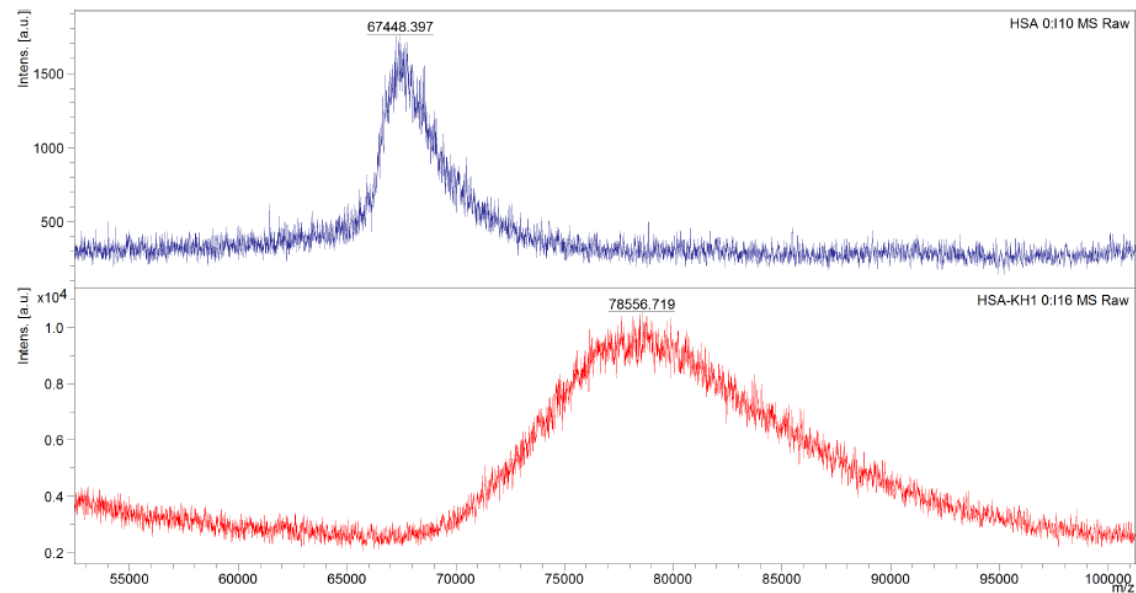

**Figure S4.** MALDI-TOF mass spectra of HSA (top) and conjugate **2c** (bottom) that were used for the calculation of carbohydrate loading of **2c**.
